# Supplementary material for: High dose ionizing radiation regulates micro RNA and gene expression changes in human peripheral blood mononuclear cells
Source: PubMed Central journal article supplement (PMC4182888; doi:10.1186/1471-2164-15-814), 2014-09-25

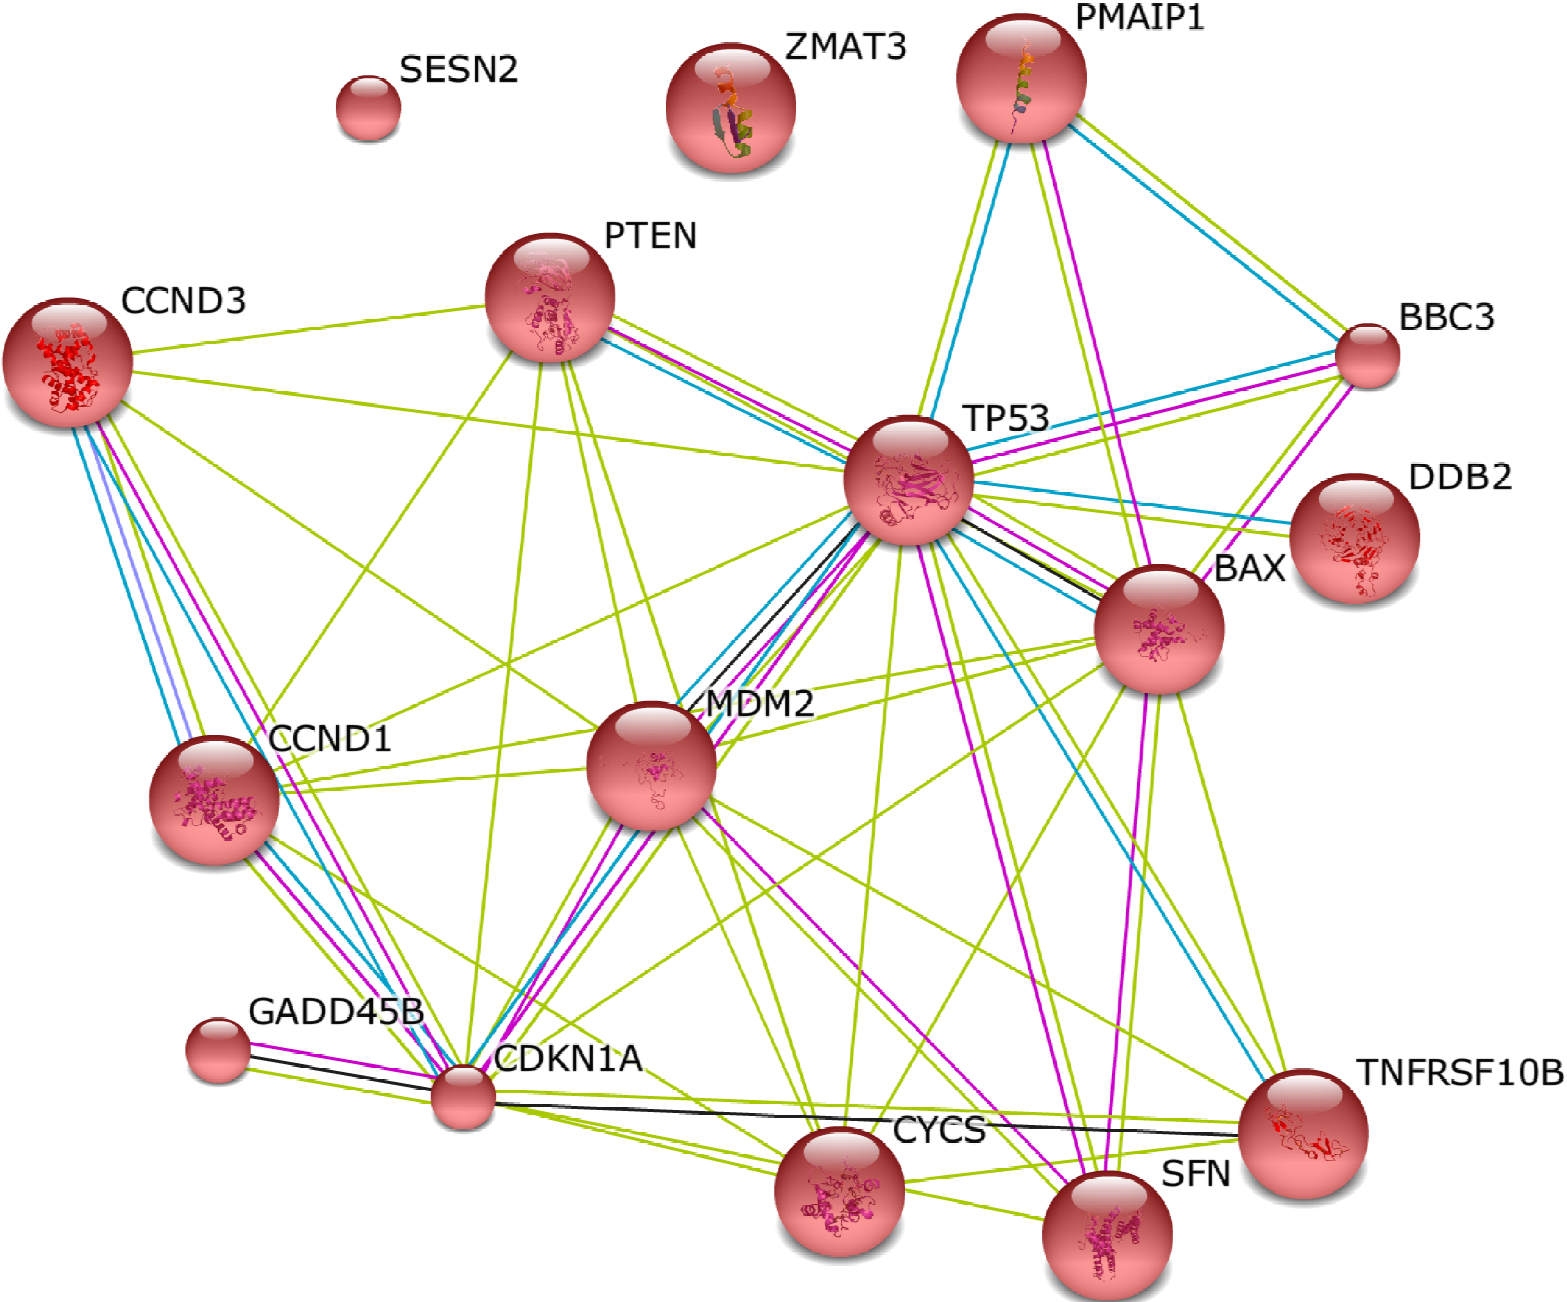

Supplement: 12864_2014_6490_MOESM9_ESM.pdf [file 12864_2014_6490_MOESM9_ESM.pdf]
